# Supplementary material
Source: PubMed Central journal article supplement (PMC6881832)
Supplement: ao9b02514_si_001.pdf [file ao9b02514_si_001.pdf]

## **Supporting Information**

### **Facile synthesis and evaluation of electron transport and photophysical properties of photoluminescent PDI derivatives**

**Samya Naqvi,<sup>a</sup> Mahesh Kumar<sup>b</sup> and Rachana Kumar<sup>a\*</sup>**

Advanced Materials and Devices Metrology Division

<sup>a</sup>Photovoltaic Metrology Group

<sup>b</sup>Photonics Materials Metrology Group

CSIR-National Physical Laboratory

Dr. K. S. Krishnan Marg, New Delhi

India-110012

\*Corresponding Author

Advanced Materials and Devices Metrology Division

Photovoltaic Metrology Group

CSIR-National Physical Laboratory

Dr. K. S. Krishnan Marg, New Delhi

India-110012

E-mail: rachanak.npl@nic.in, rachanasinghchem@gmail.com

Tel: +91-11-4560-8577

Fax : +91-11-4560-9310

| Contents                                                                                                                                                                                                                                                         | Page No. |
|------------------------------------------------------------------------------------------------------------------------------------------------------------------------------------------------------------------------------------------------------------------|----------|
| 1. Figure S1. FTIR of PTCDA                                                                                                                                                                                                                                      | S3       |
| 2. Figure S2. FTIR spectra of (A) <i>i</i> PrP-PDI and (B) NO <sub>2</sub> P-PDI                                                                                                                                                                                 | S4       |
| 3. Figure S3. FTIR spectra of (A) DPM-PDI and (B) PFP-PDI                                                                                                                                                                                                        | S5       |
| 4. Figure S4. (A) <sup>1</sup> H NMR, and (B) HR-MS spectra of <i>i</i> PrP-PDI                                                                                                                                                                                  | S6-S7    |
| 5. Figure S5. (A) <sup>1</sup> H NMR and (B) HR-MS spectra of NO <sub>2</sub> P-PDI                                                                                                                                                                              | S8-S9    |
| 6. Figure S6. (A) <sup>1</sup> H NMR, and (B) HR-MS spectra of DPM-PDI                                                                                                                                                                                           | S10-S11  |
| 7. Figure S7. (A) <sup>1</sup> H NMR, and (B) HR-MS spectra of PFP-PDI                                                                                                                                                                                           | S12-S13  |
| 8. Figure S8. Concentration variable absorption spectra of PDIs in toluene                                                                                                                                                                                       | S14      |
| 9. Figure S9. Comparative A(0-1)/A(0-0) transition with change in concentration for PDIs                                                                                                                                                                         | S14      |
| 10. Figure S10. Comparative absorption emission spectra of the PDIs in chloroform solution                                                                                                                                                                       | S15      |
| 11. Figure S11. Temperature variable (20-80 °C) absorption spectra of PDI derivatives in toluene solution (diluted)                                                                                                                                              | S16-17   |
| 12. Figure S12. Temperature variable (20-80 °C) fluorescence spectra of PDI derivatives in toluene solution (0.5 mM) using 450 nm excitation wavelength                                                                                                          | S18-19   |
| 13. Figure S13. TGA of <i>i</i> PrP-PDI, NO <sub>2</sub> P-PDI, DPM-PDI and PFP-PDI under N <sub>2</sub> flow of 20 mL min <sup>-1</sup> at 10 °C min <sup>-1</sup> temperature ramping                                                                          | S20      |
| 14. Figure S14. Electrical conductivity data (A) I vs V (B) Electrical conductivity at different temperatures for all the four PDIs                                                                                                                              | S21      |
| 15. Figure S15. Electron transport J-V plots for all the four PDIs with slope                                                                                                                                                                                    | S22      |
| 16. Figure S16. P3HT TAS spectra using 480 nm pump wavelength in visible and NIR region                                                                                                                                                                          | S23      |
| 17. Figure S17. TAS spectra of P3HT mixture with (a) <i>i</i> PrP-PDI, (b) NO <sub>2</sub> P-PDI, (c) DPM-PDI and (d) PFP-PDI for NIR region using 480 nm pump wavelength. Inset shows the decay of ~1140 nm transient absorption for P3HT singlet excited state | S24-25   |

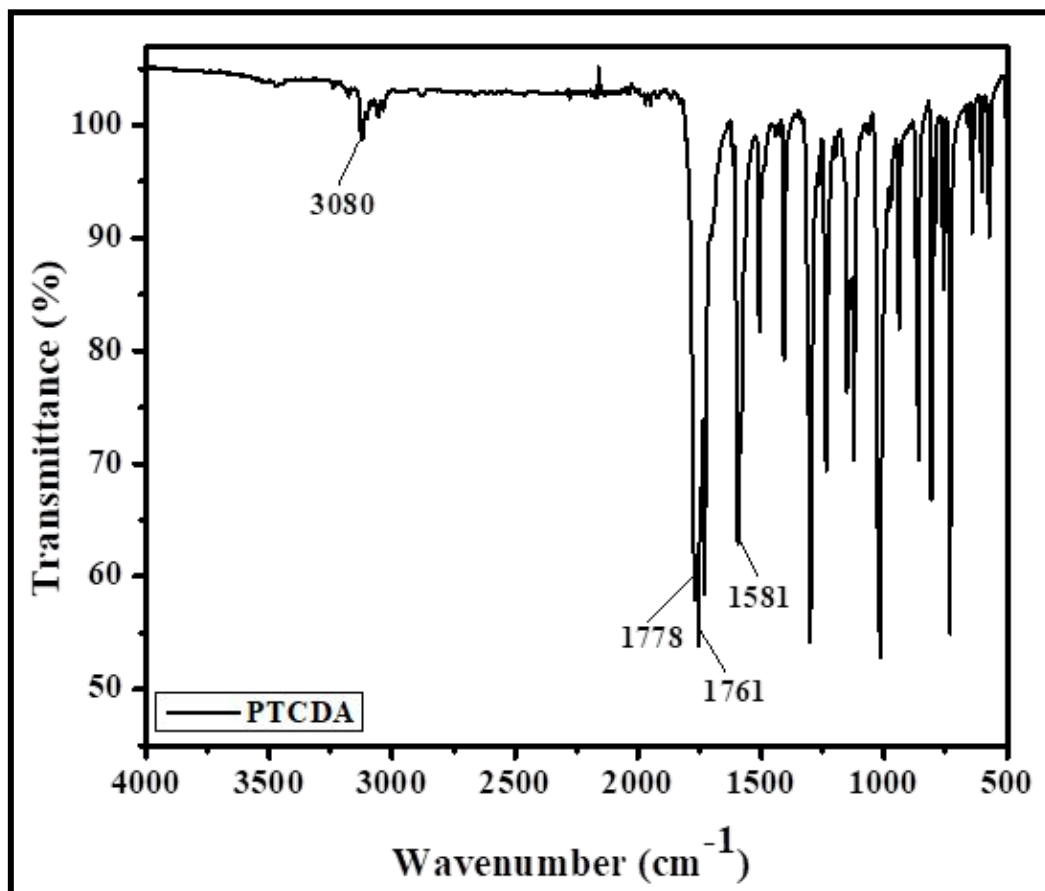

Figure S1. FT-IR spectra of Perylene-3,4,9,10 tetracarboxylic dianhydride (PTCDA).

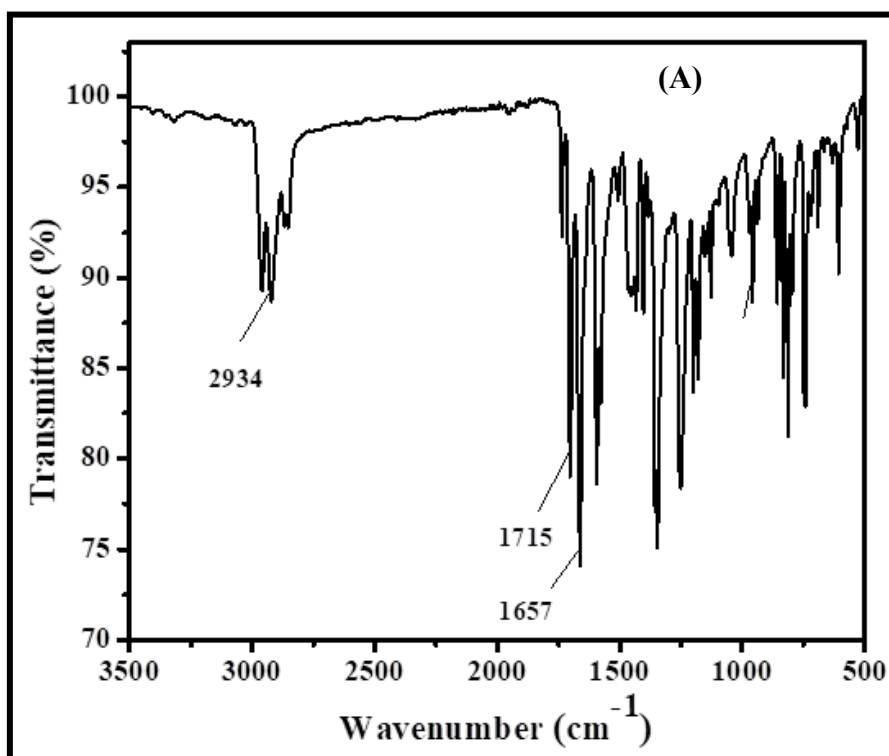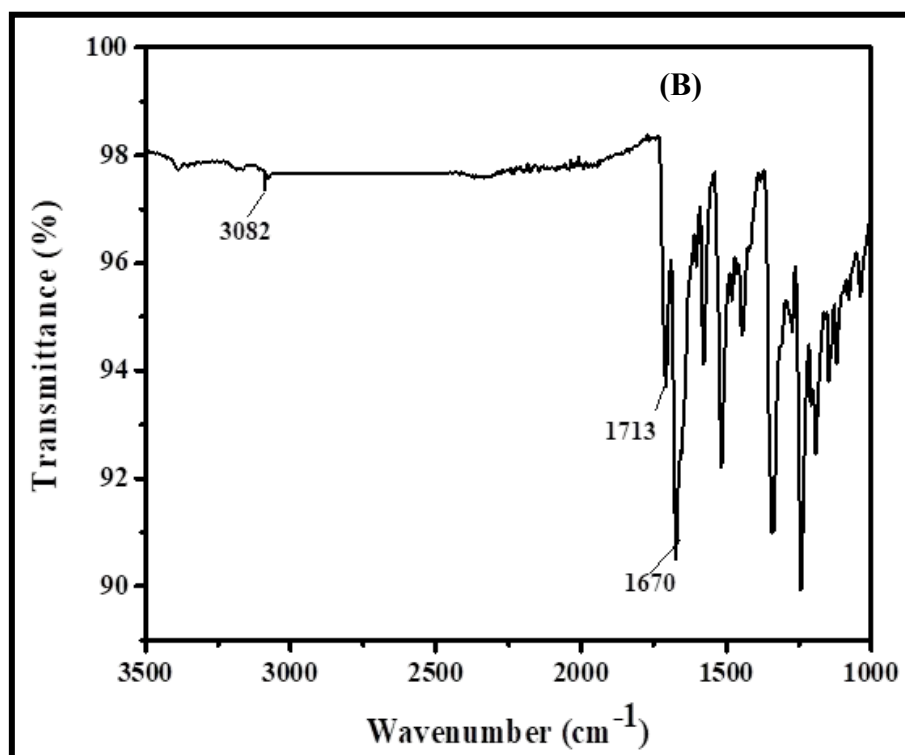

Figure S2. FT-IR spectra of (A) *i*PrP-PDI (1) and (B) NO<sub>2</sub>P-PDI (2).

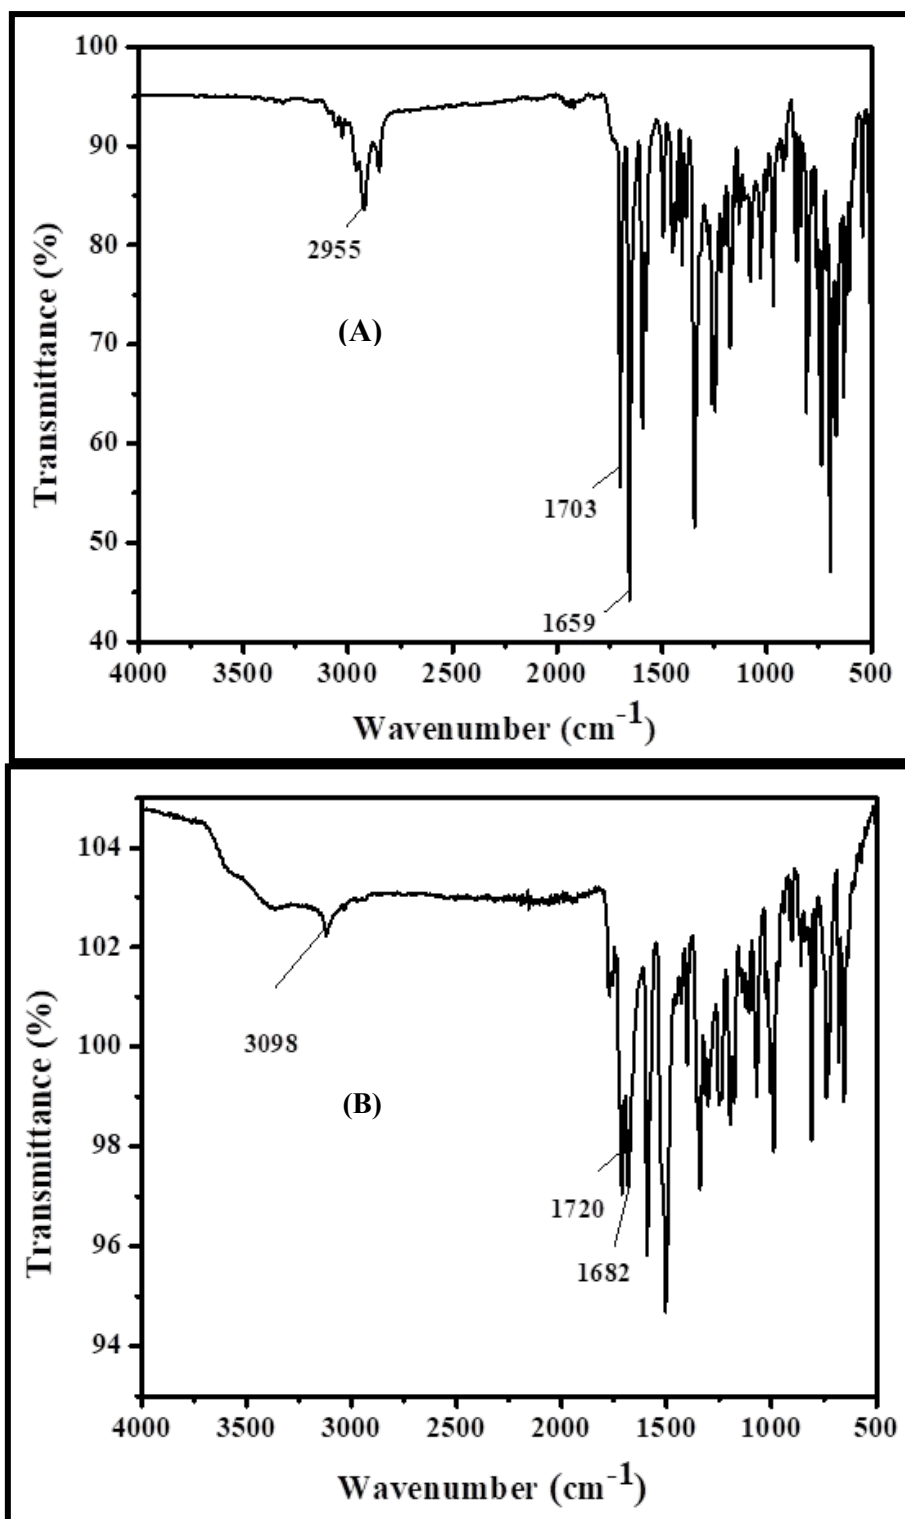

Figure S3. FT-IR spectra of (A) DPM-PDI (3) and (B) PFP-PDI (4).

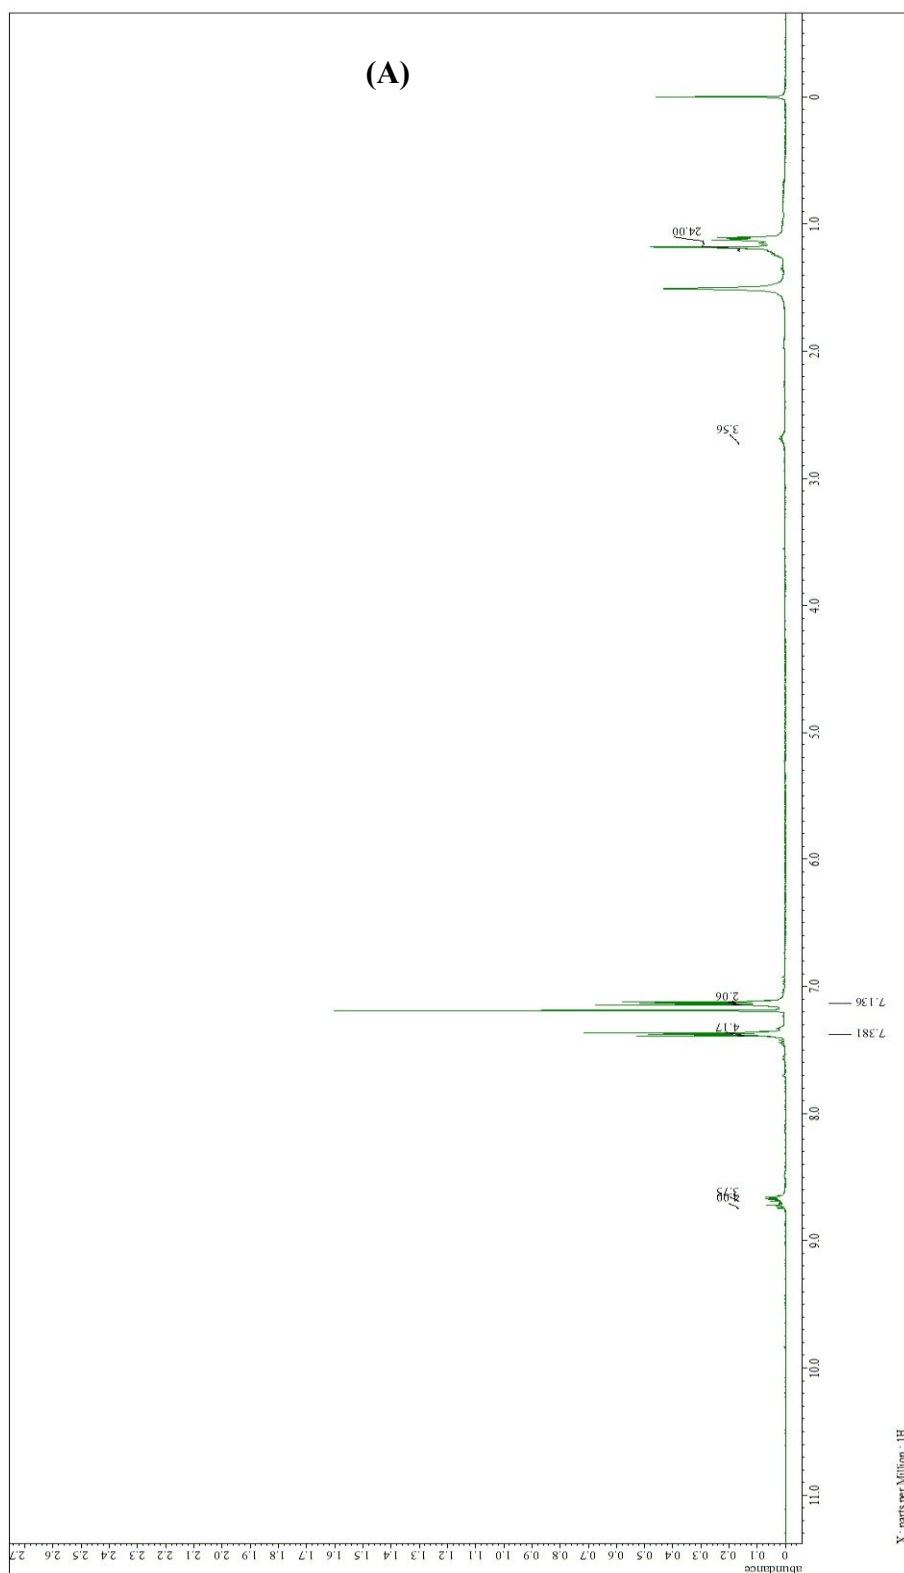

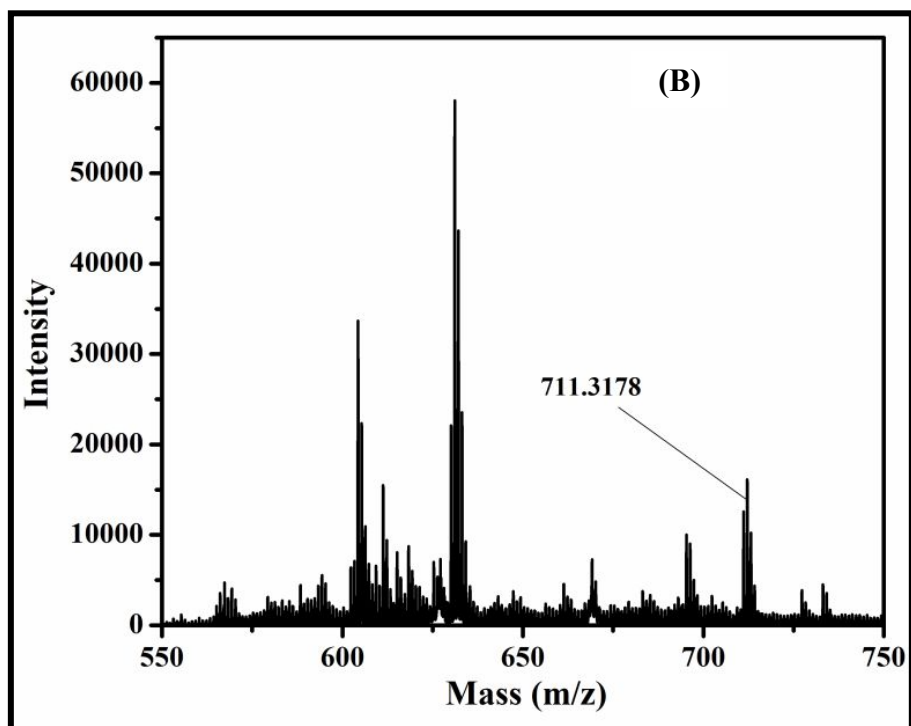

Figure S4. (A)  $^1\text{H}$  NMR, and (B) HR-MS spectra of *iPrP*-PDI.

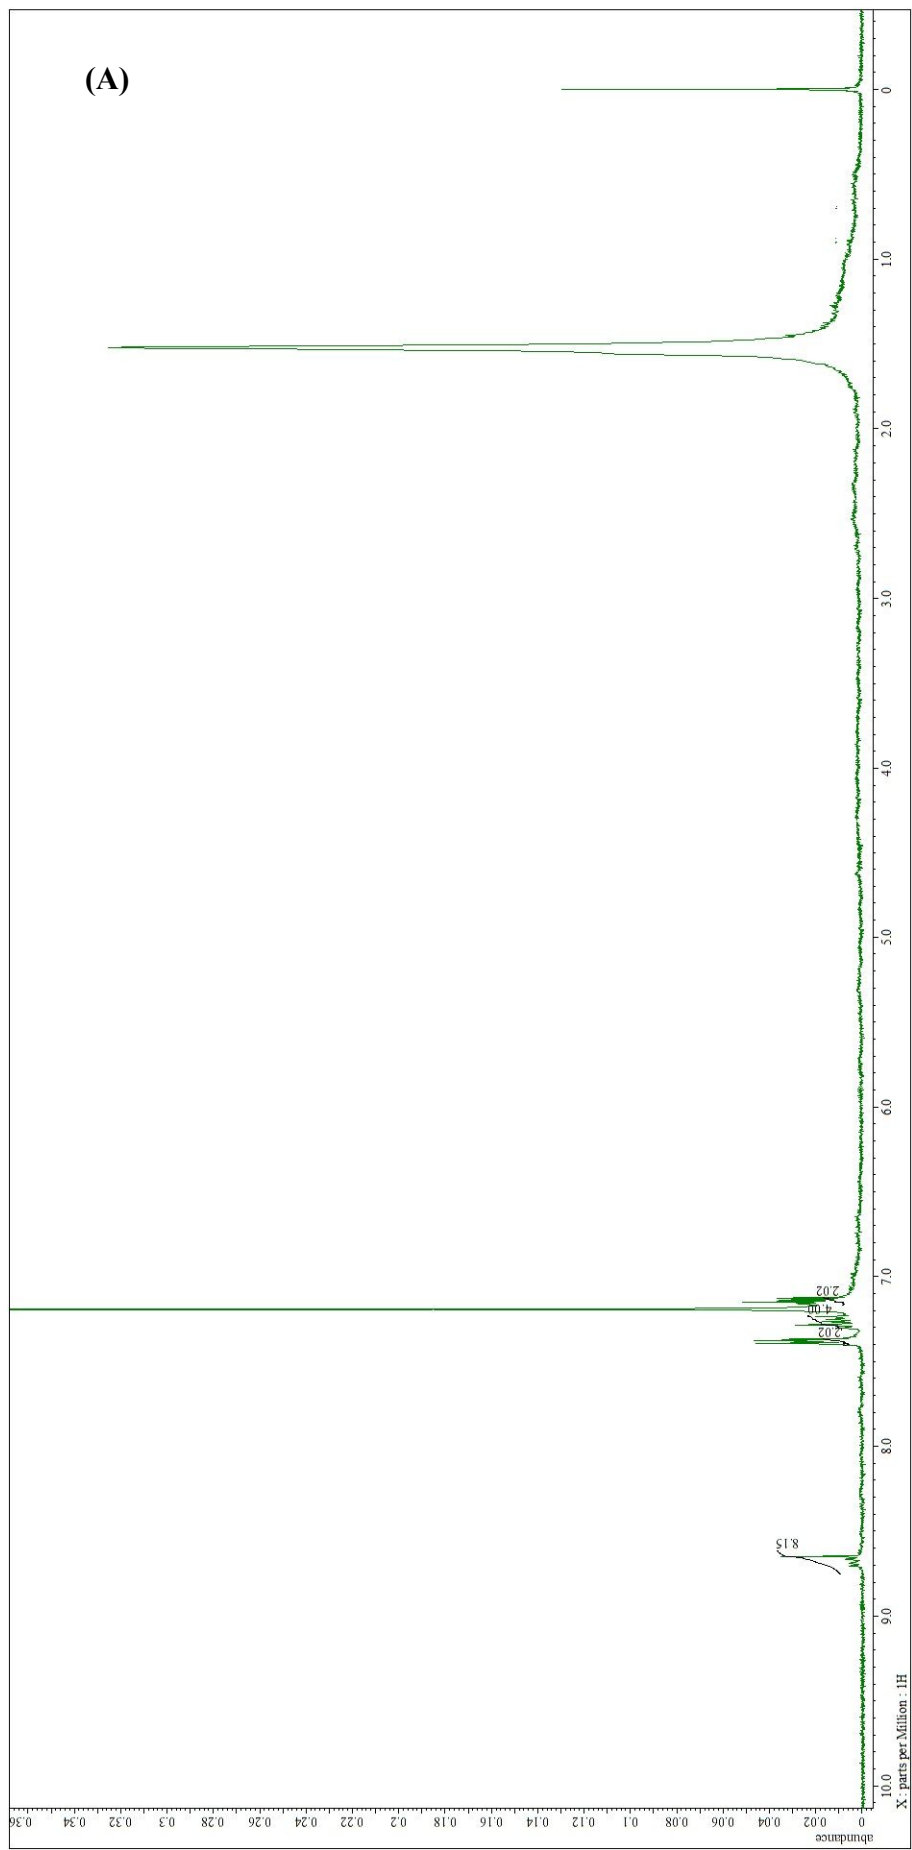



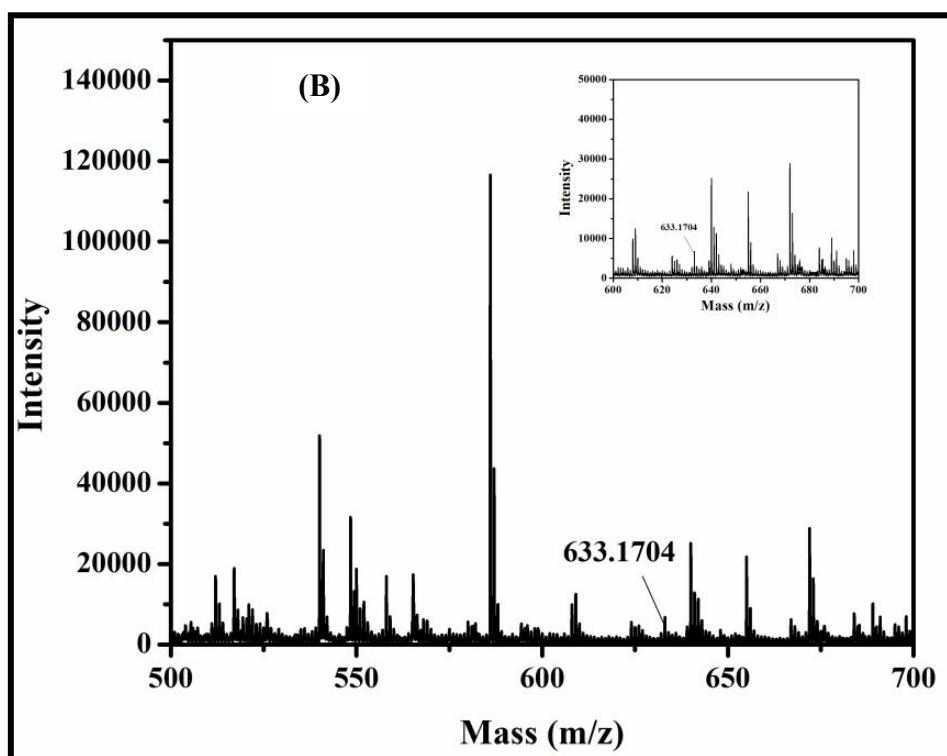

Figure S5. (A)  $^1\text{H}$  NMR and (B) HR-MS spectra of  $\text{NO}_2\text{P-PDI}$ .

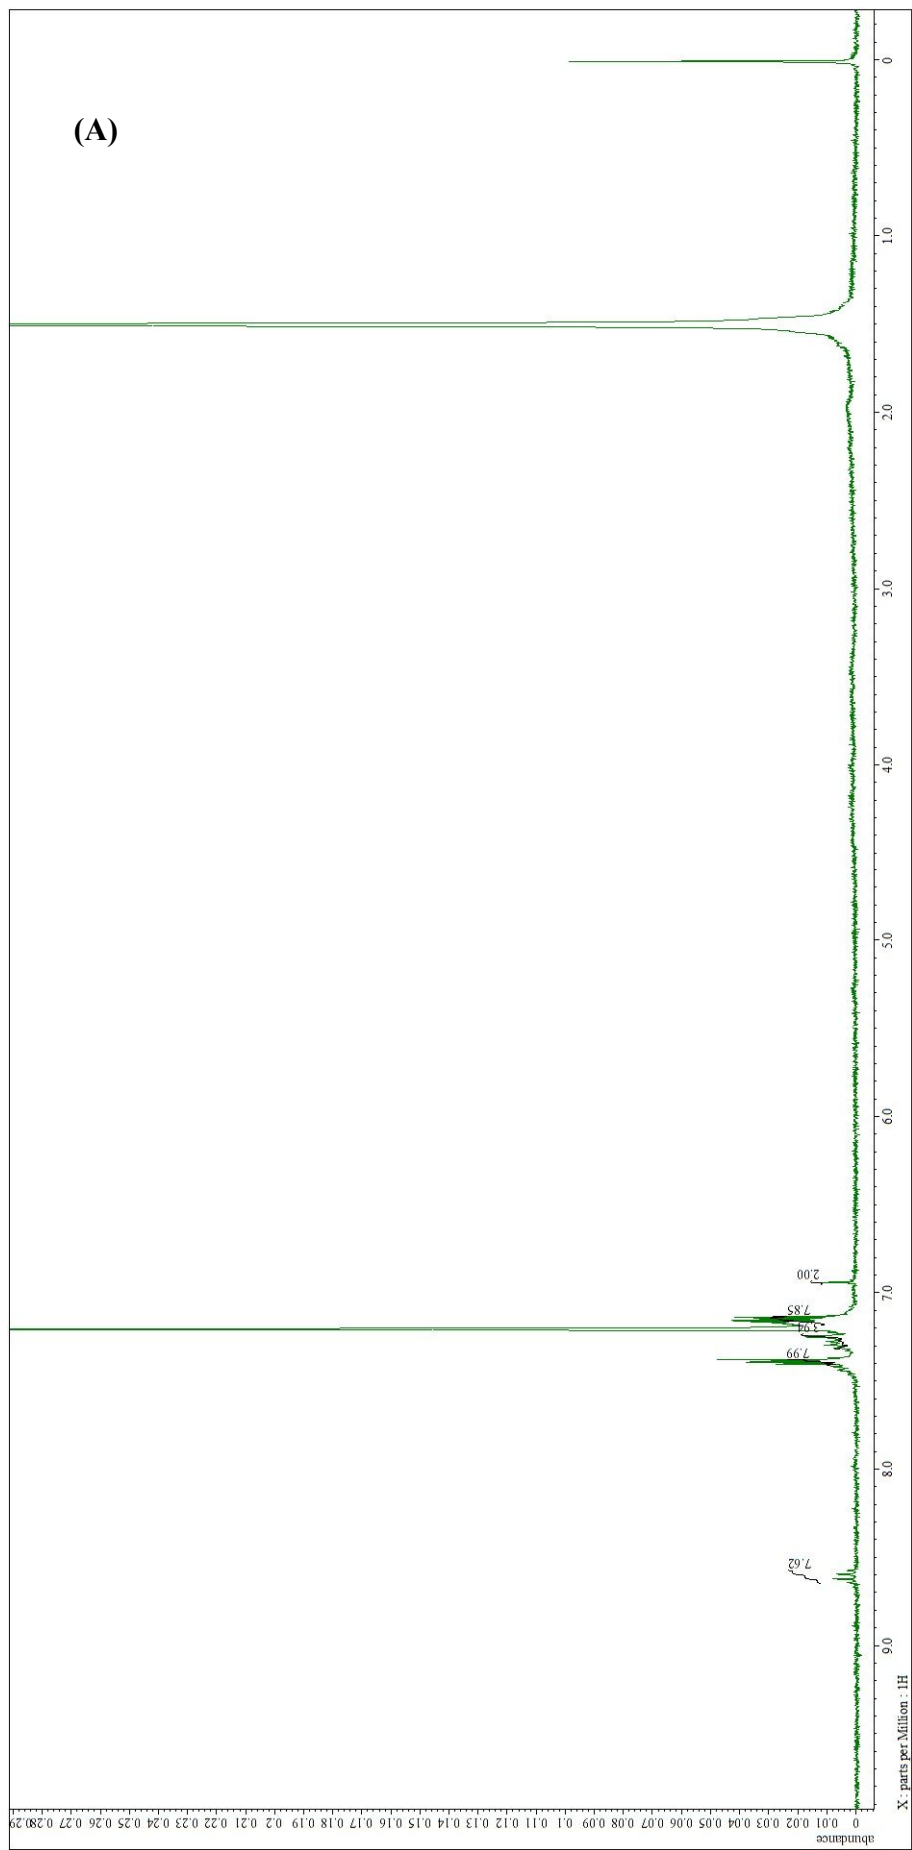

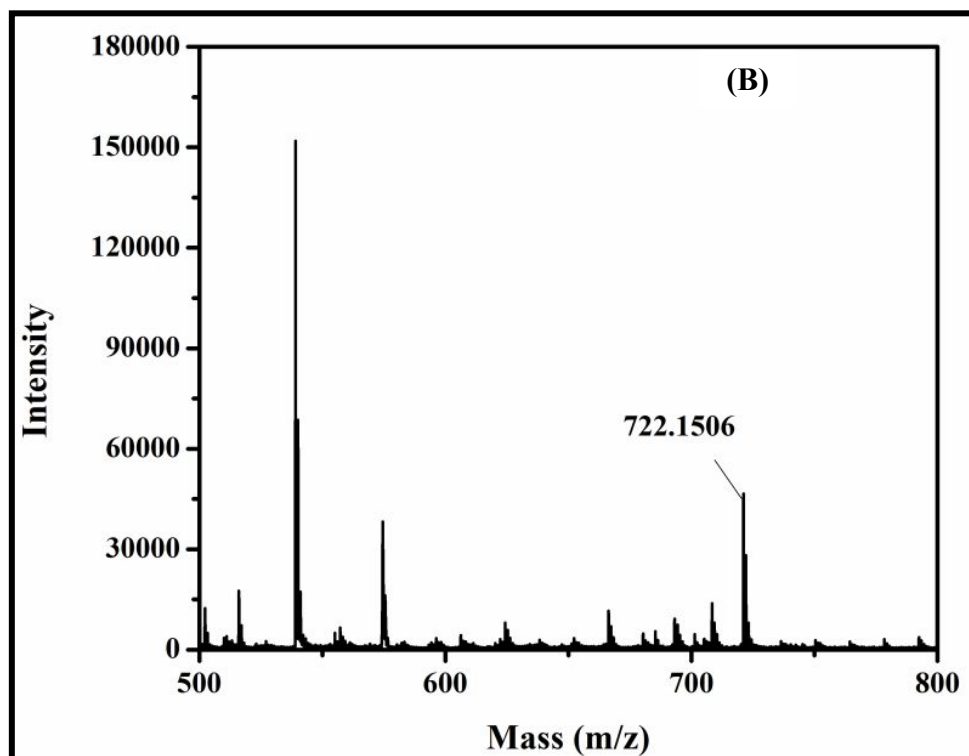

Figure S6. (A)  $^1\text{H}$  NMR, and (B) HR-MS spectra of DPM-PDI.

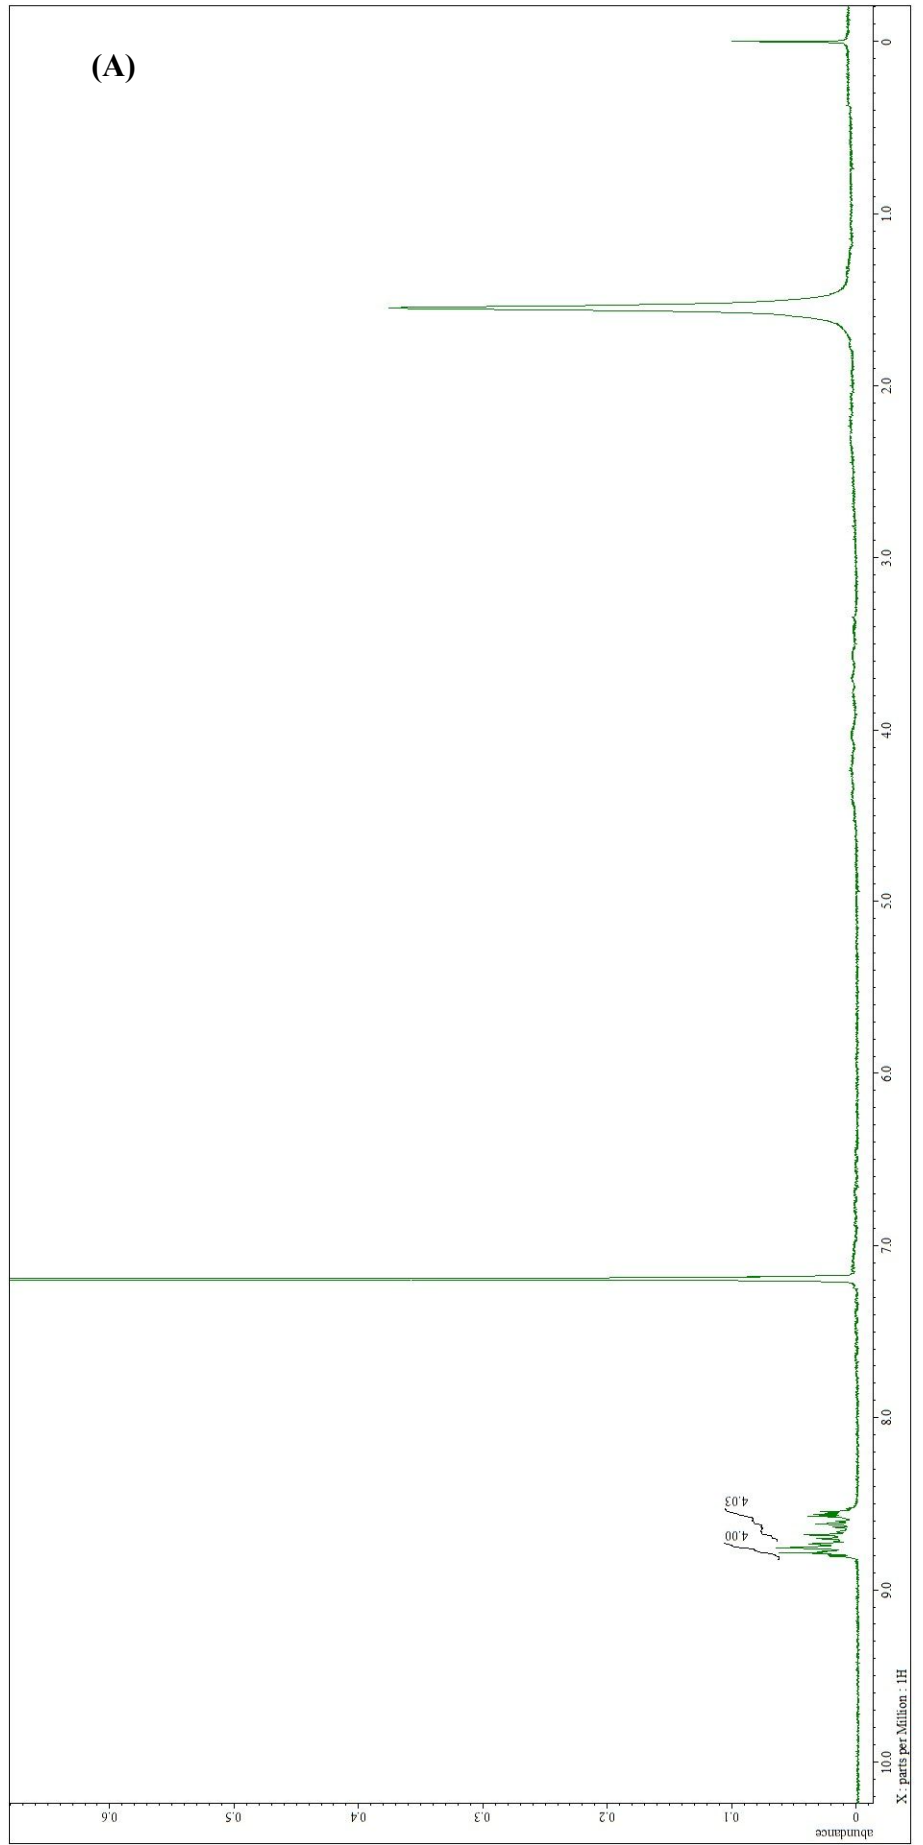

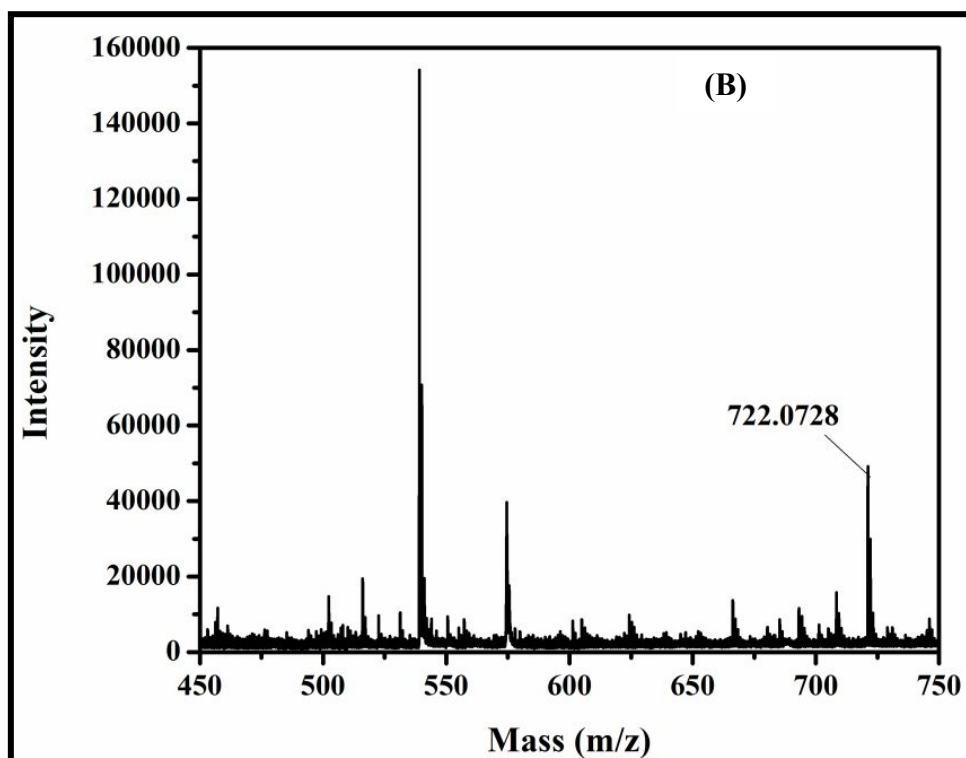

Figure S7. (A)  $^1\text{H}$  NMR, and (B) HR-MS spectra of PFP-PDI.

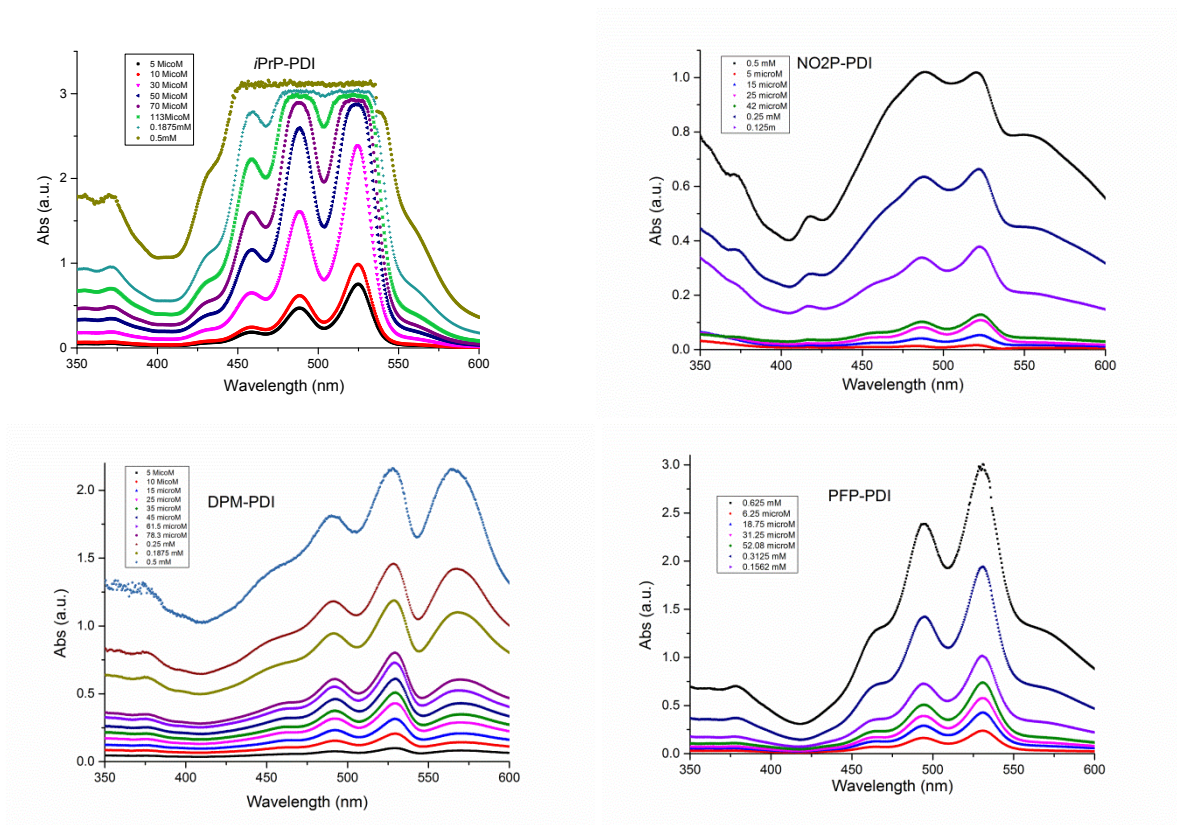

**Figure S8.** Concentration variable absorption spectra of PDIs in toluene.

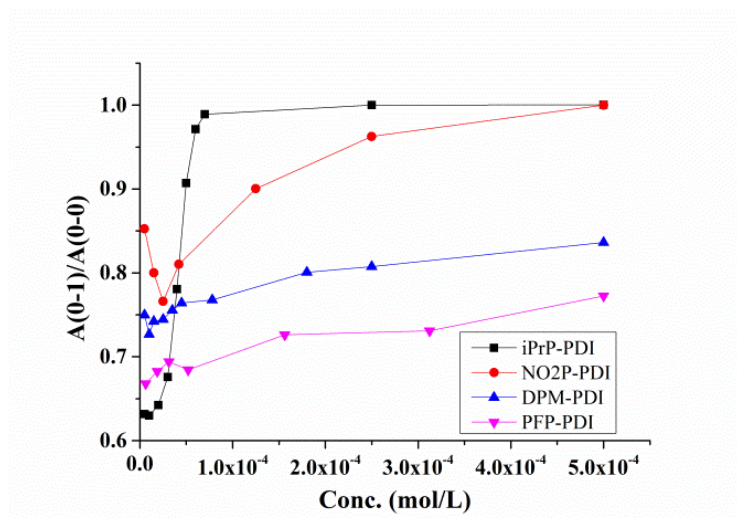

**Figure S9.** Comparative  $A_{(0-1)}/A_{(0-0)}$  transition with change in concentration for PDIs.

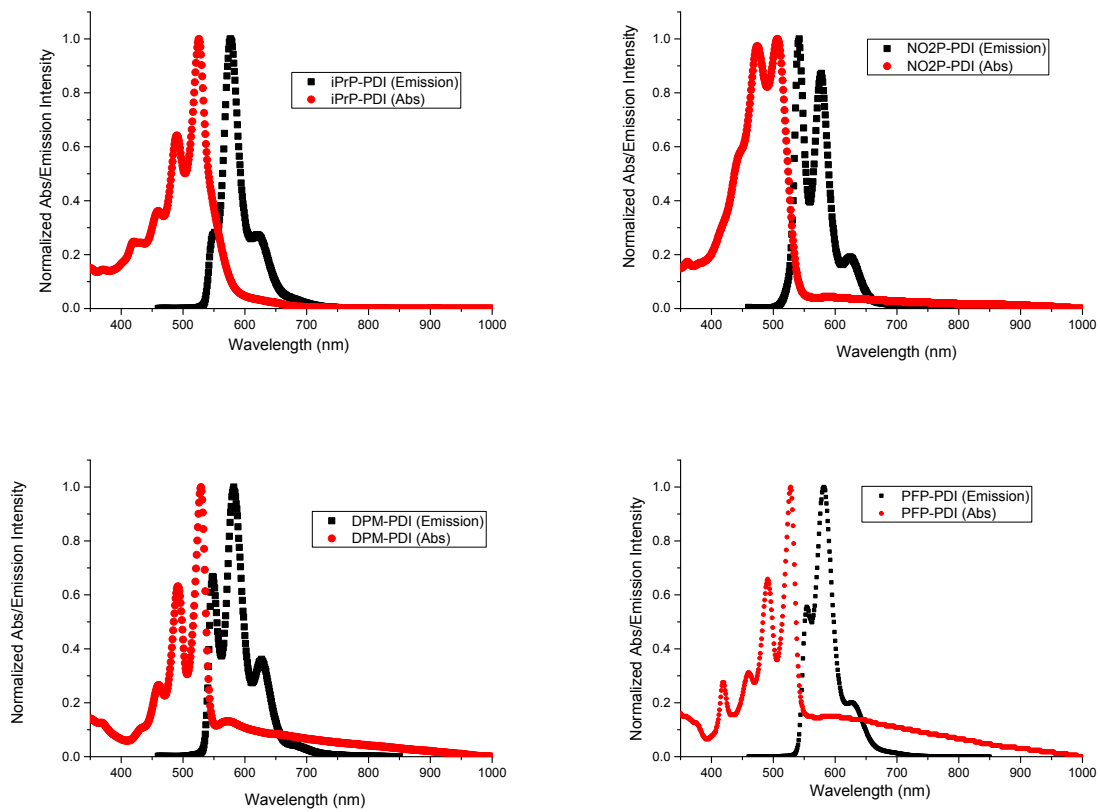

**Figure S10.** Comparative absorption emission spectra of the PDIs in chloroform solution.

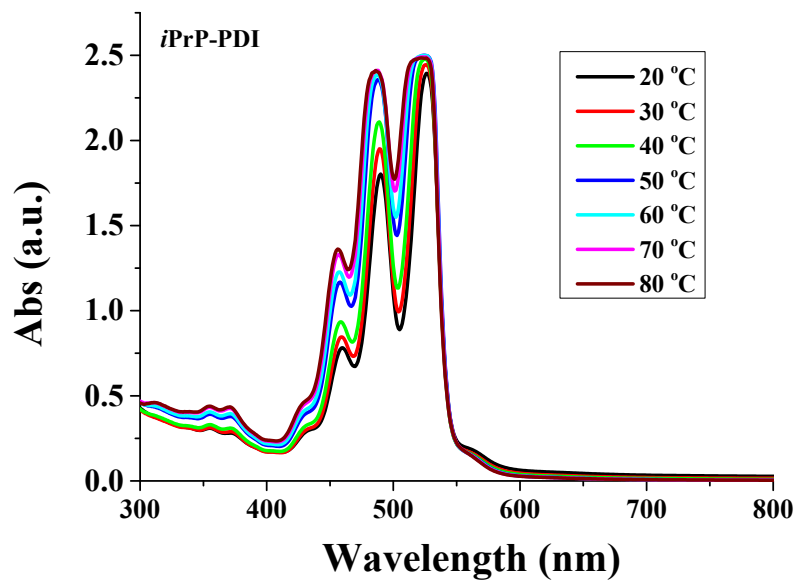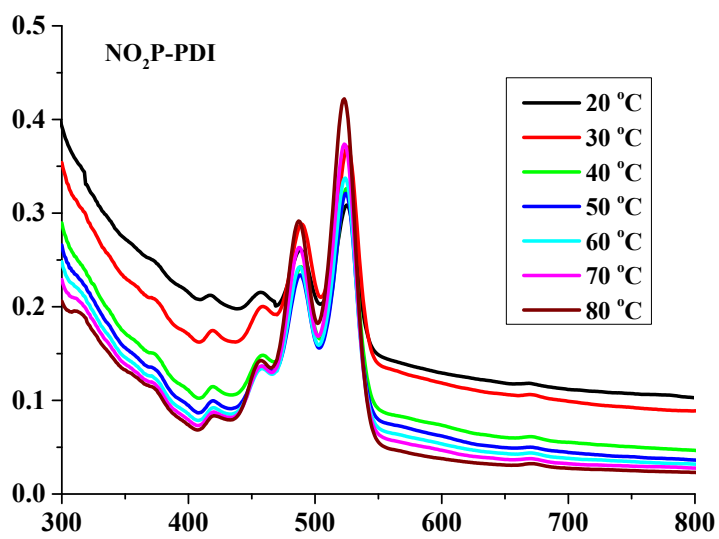



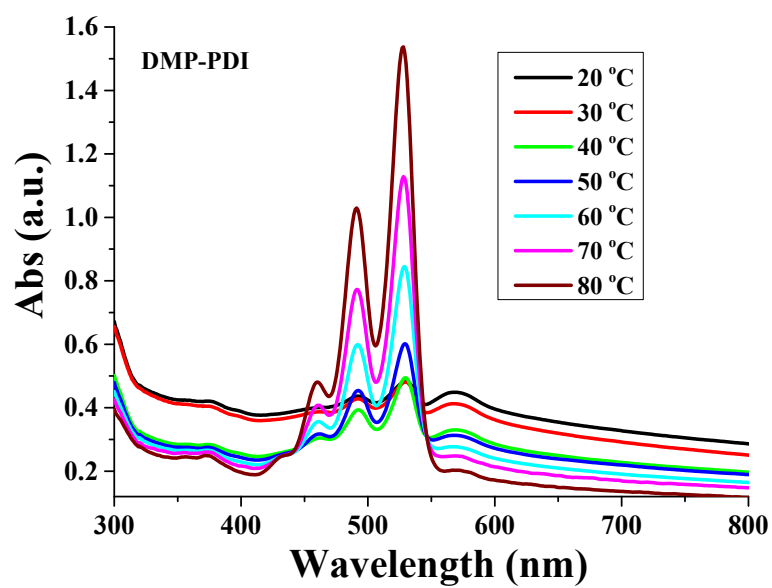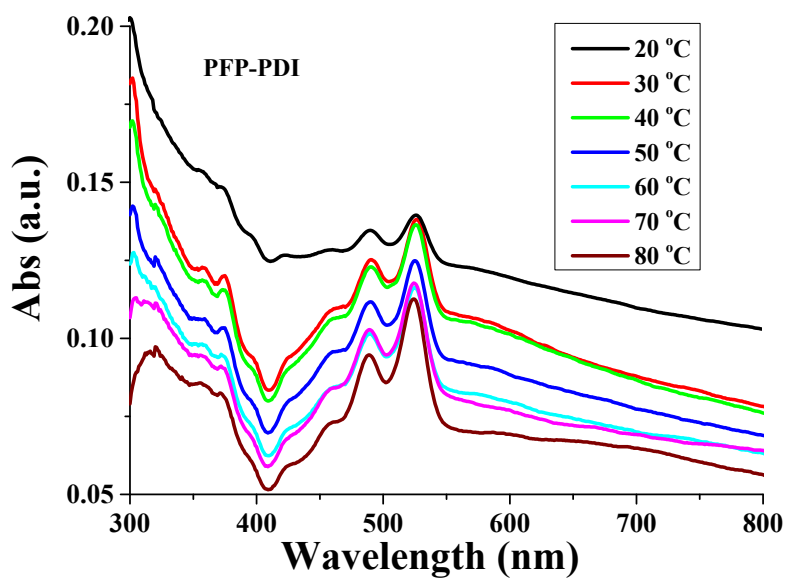

Figure S11. Temperature variable (20-80 °C) absorption spectra of PDI derivatives in toluene solution (diluted).

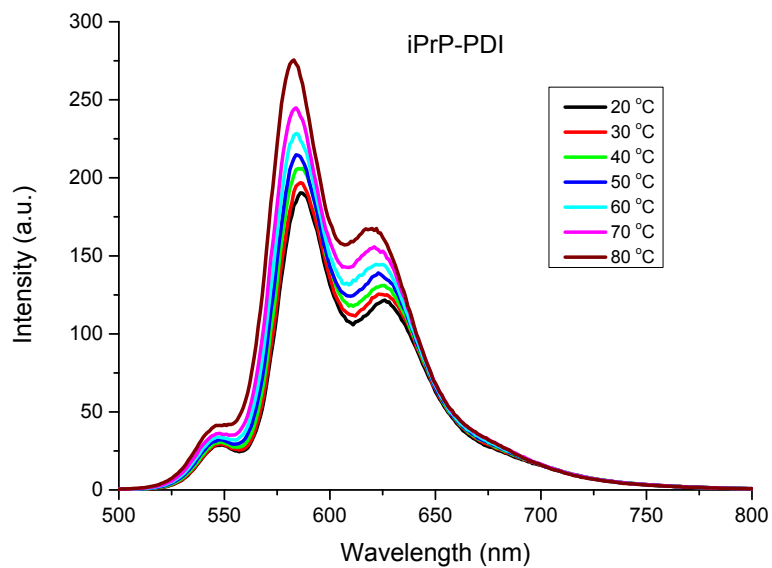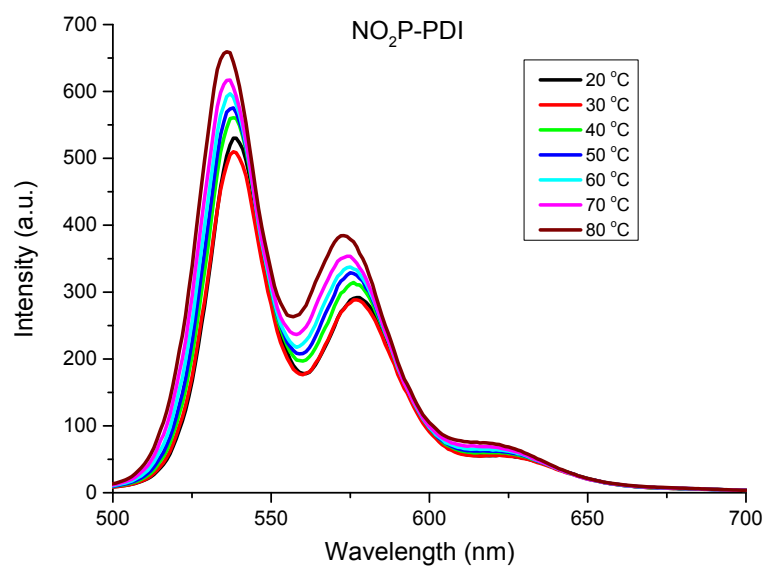

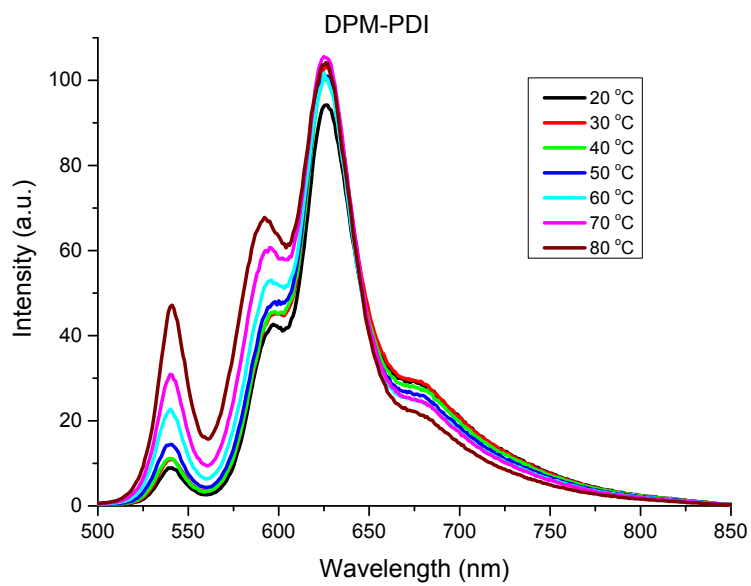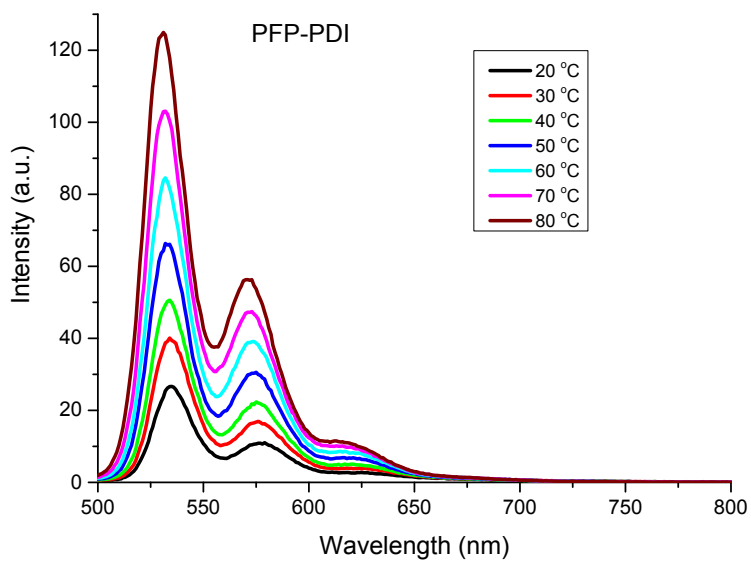

Figure S12. Temperature variable (20-80 °C) fluorescence spectra of PDI derivatives in toluene solution (0.5 mM) using 450 nm excitation wavelength.

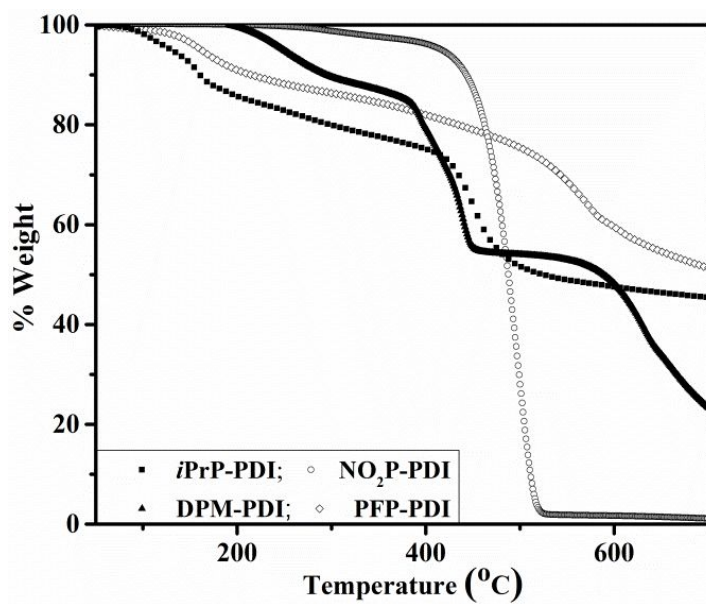

**Figure S13.** TGA of *i*PrP-PDI (1), NO<sub>2</sub>P-PDI (2), DPM-PDI (3) and PFP-PDI (4) under N<sub>2</sub> flow of 20 mL min<sup>-1</sup> at 10 °C min<sup>-1</sup> temperature ramping.

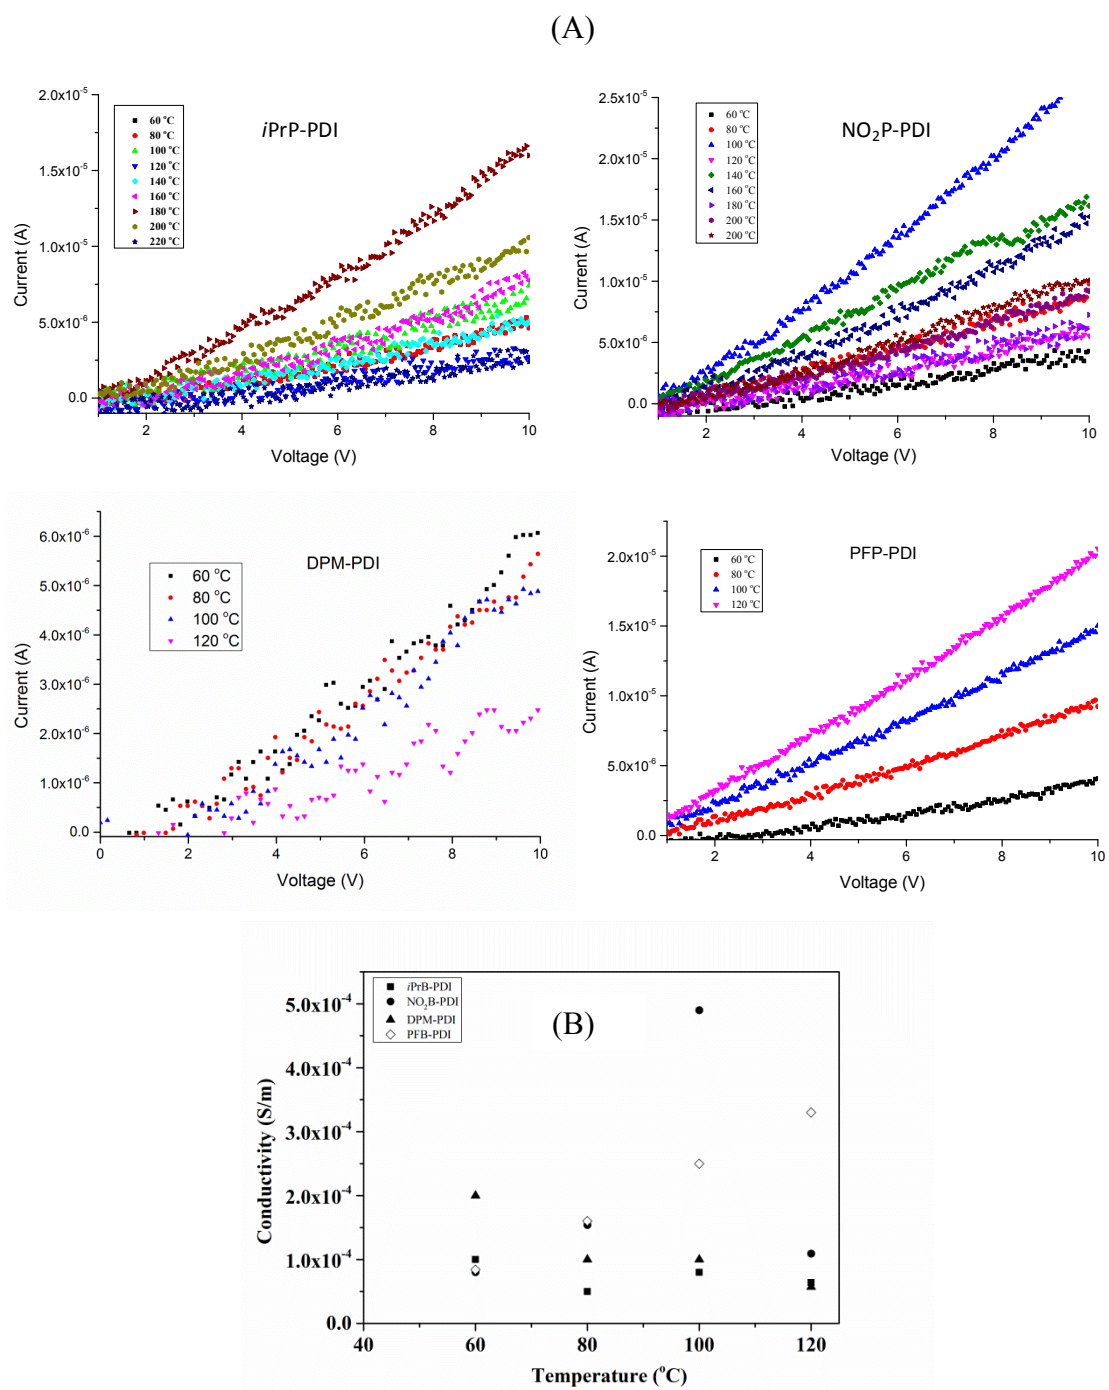

Figure S14. Electrical conductivity data (A) I vs V (B) Electrical conductivity at different temperatures for all the four PDIs.

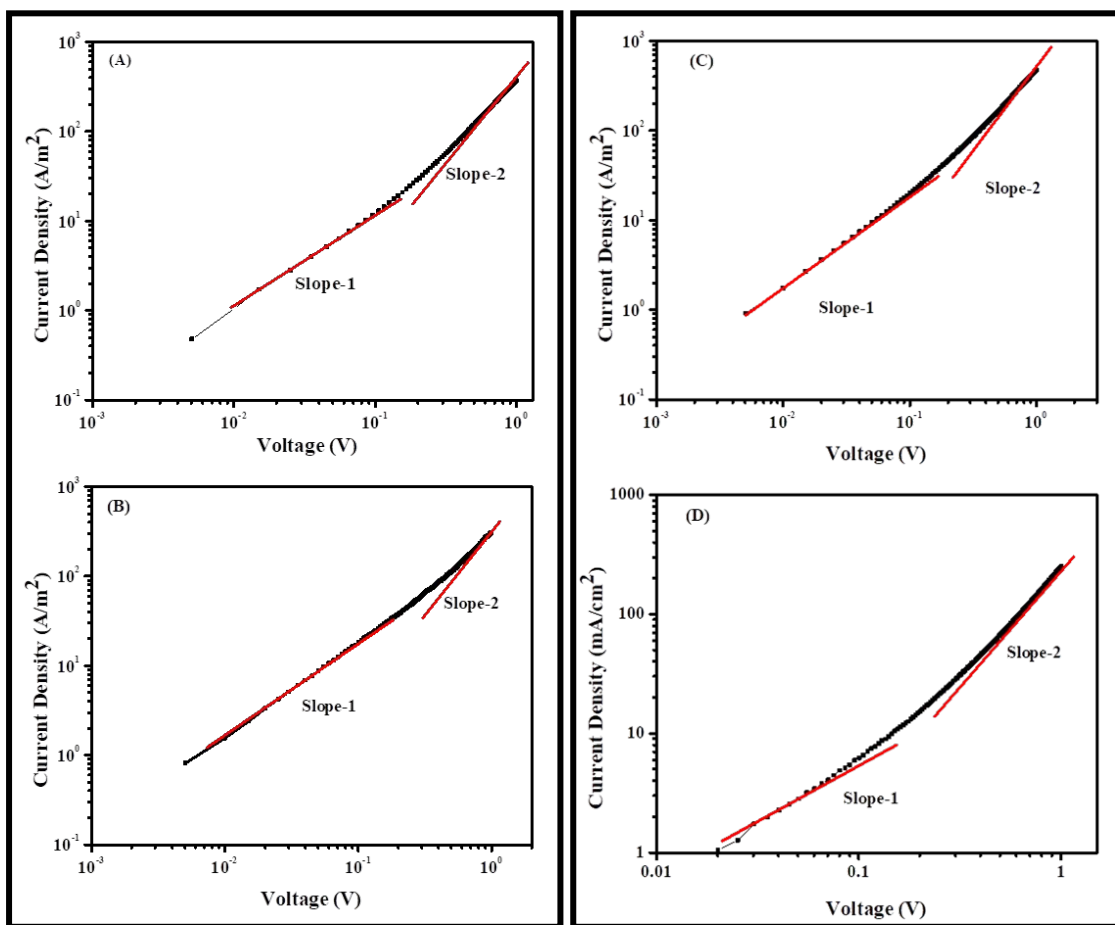

Figure S15. Electron transport J-V plots for (A) *i*PrP-PDI, (B)  $\text{NO}_2$ P-PDI, (C) DPM-PDI and (D) PFP-PDI with slope.

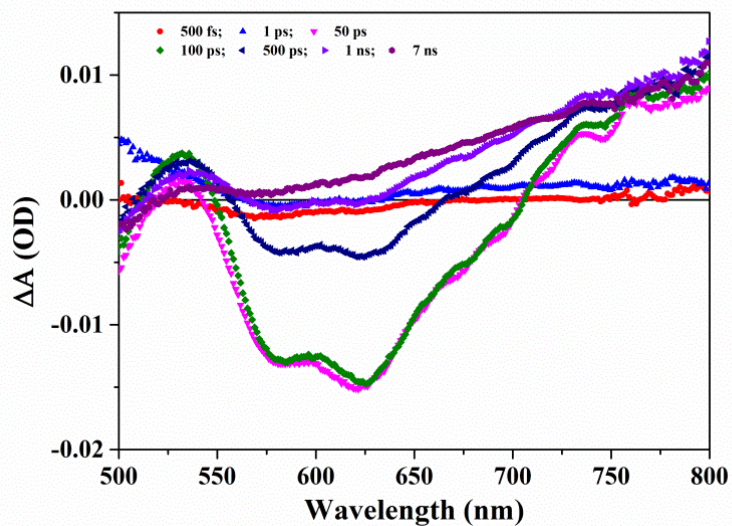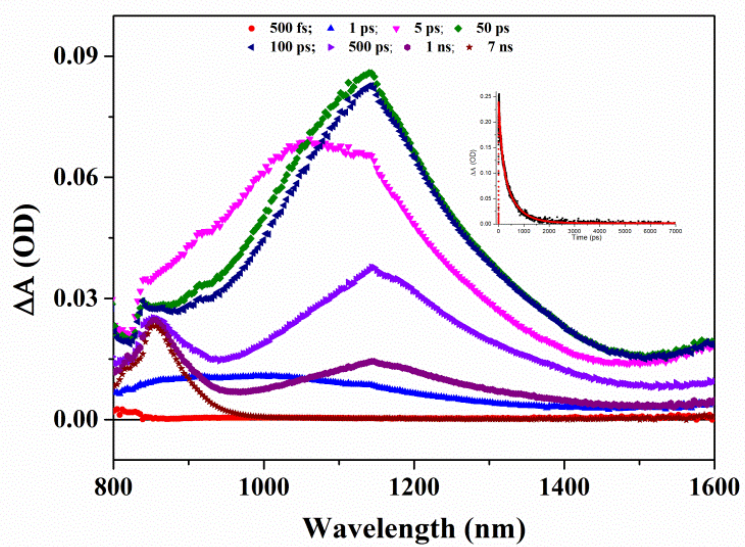

Figure S16. P3HT TAS spectra using 480 nm pump wavelength in visible and NIR region.

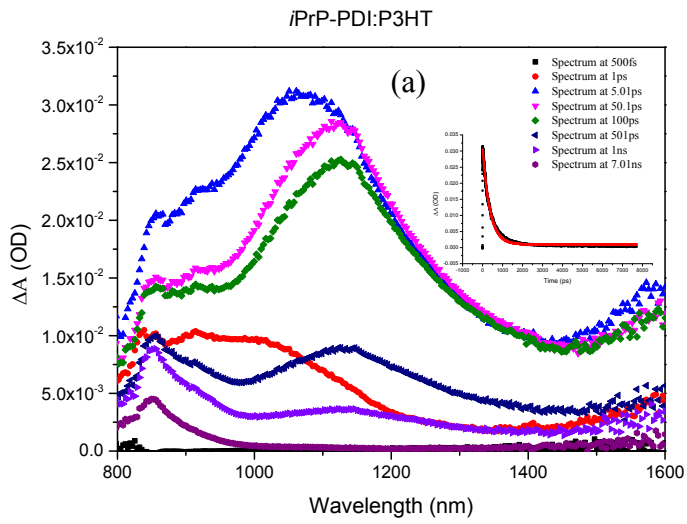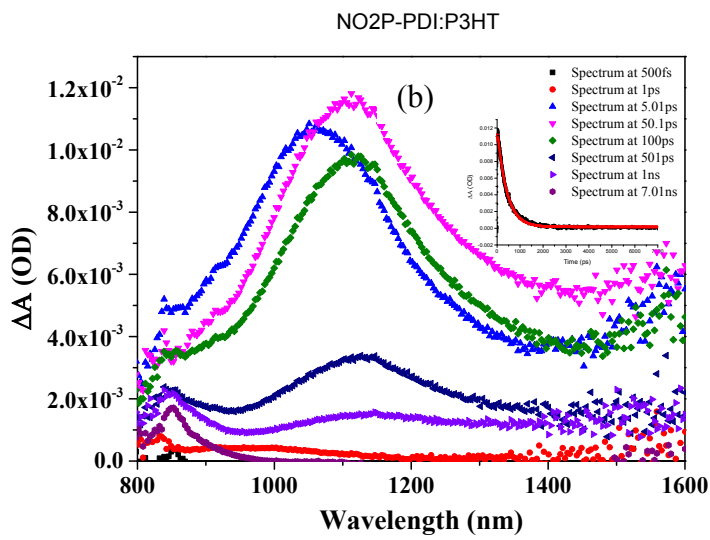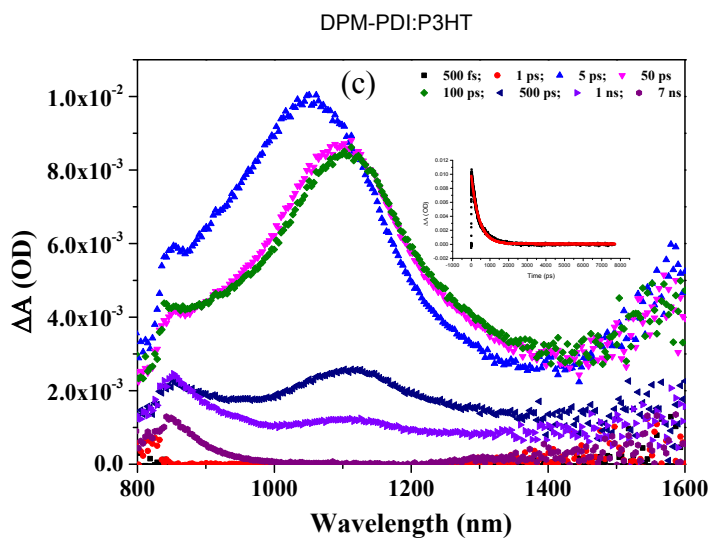



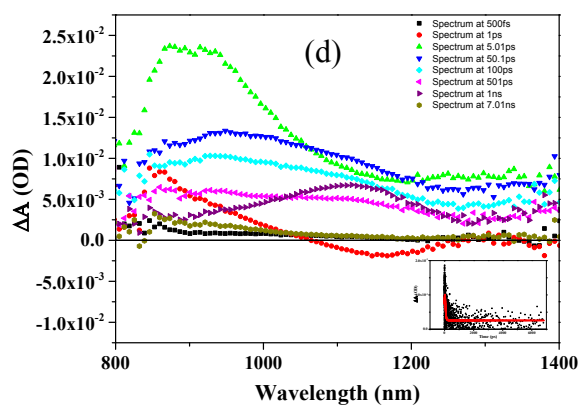

Figure S17. TAS spectra of P3HT mixture with (a) *i*PrP-PDI, (b) NO<sub>2</sub>P-PDI, (c) DPM-PDI and (d) PFP-PDI for NIR region using 480 nm pump wavelength. Inset shows the decay of ~1140 nm transient absorption for P3HT singlet excited state.
